# Supplementary material for: Equine-Assisted Activities (EAAs) for Children with Autism Spectrum Disorder (ASD): Positive Effects Revealed Using an Ethological Approach
Source: MDPI journal article supplement (doi:10.3390/app13137417), 2023-06-22
Supplement: s1 [file s1]

**Supplementary Table S1.** Description of horses involved in the current study (n=19)

| <b>Riding Center</b> | <b>Horse name<br/>[Horse/Pony]</b> | <b>Sex</b> | <b>Horse Age (years)</b> | <b>Horse's Experience<br/>in EAA (years)</b> |
|----------------------|------------------------------------|------------|--------------------------|----------------------------------------------|
| Center 1             | Winter [Pony]                      | M          | 8                        | 2                                            |
|                      | Pasqualino [Pony]                  | M          | 16                       | 7                                            |
|                      | Giove [Horse]                      | M          | 18                       | 3                                            |
|                      | Lady [Horse]                       | F          | 11                       | 4                                            |
| Center 2             | GioveGR [Horse]                    | M          | 12                       | 4                                            |
|                      | Jast [Horse]                       | M          | 11                       | 2                                            |
|                      | Petisso [Pony]                     | M          | 13                       | 4                                            |
|                      | Beauty [Horse]                     | M          | 10                       | 4                                            |
| Center 3             | Babà [Horse]                       | F          | 16                       | 5                                            |
|                      | Spillo [Pony]                      | M          | 26                       | 5                                            |
|                      | Pinta [Pony]                       | F          | 18                       | 4                                            |
|                      | Gaia [Horse]                       | F          | 13                       | 3                                            |
|                      | Sirio [Horse]                      | M          | 18                       | 5                                            |
|                      | Iago [Horse]                       | M          | 23                       | 5                                            |
| Center 4             | Miele [Pony]                       | F          | 19                       | 4                                            |
|                      | Turi [Horse]                       | M          | 25                       | 4                                            |
|                      | Bonbon [Pony]                      | M          | 25                       | 14                                           |
|                      | Etruria [Horse]                    | F          | 24                       | 6                                            |
|                      | Flamenco[Pony]                     | M          | 22                       | 4                                            |

*Abbreviations.* EAA, Equine Assisted Activities.
